# Supplementary material for: Can platelet-rich plasma injections provide better pain relief and functional outcomes in persons with common shoulder diseases: a meta-analysis of randomized controlled trials
Source: PubMed Central journal article supplement — Clin Shoulder Elb. 2021 Nov 19;25(1):73–89. doi: 10.5397/cise.2021.00353 (PMC8907495; doi:10.5397/cise.2021.00353), 2021-11-19
Supplement: cise-2021-00353-supple1.pdf [file cise-2021-00353-supple1.pdf]

## Supplementary Material 1. Identification of trials and search method

### PubMed, The Cochrane Collaboration Central Register of Controlled Trials (CENTRAL) and Cochrane Database of Systematic Reviews

The electronic search was carried out using the series of search terms combined with the Boolean Operators 'AND', 'OR' and 'NOT', using following key words.

#### Therapeutic Terms

- platelet rich plasma
- PRP
- autologous platelet concentrate
- autologous growth factors
- Plasma Rich in Growth Factor
- autologous blood
- platelet rich fibrin
- PRGF”
- Plasma Growth Factor
- Plasma
- injection

#### Diagnostic Search Terms

- shoulder pain
- pain
- shoulder
- rotator cuff
- rotator cuff lesion
- rotator cuff tendinopathy
- adhesive capsulitis
- frozen shoulder
- supraspinatus tendinitis
- tendinitis

#### Combination Terms

- OR/ 1-11
- OR/12-21
- AND/22-23

- (“platelet-rich plasma”[MeSH Terms] OR (“platelet-rich”[All Fields] AND “plasma”[All Fields]) OR “platelet-rich plasma”[All Fields] OR (“platelet”[All Fields] AND “rich”[All Fields] AND “plasma”[All Fields]) OR “platelet rich plasma”[All Fields]) AND (“shoulder pain”[MeSH Terms] OR (“shoulder”[All Fields] AND “pain”[All Fields]) OR “shoulder pain”[All Fields])

- “prp”[All Fields] AND (“shoulder pain”[MeSH Terms] OR (“shoulder”[All Fields] AND “pain”[All Fields]) OR “shoulder pain”[All Fields])

- (“blood platelets”[MeSH Terms] OR (“blood”[All Fields] AND “platelets”[All Fields]) OR “blood platelets”[All Fields] OR “platelet”[All Fields]) AND concentrate[All Fields]) AND (“shoulder pain”[MeSH Terms] OR (“shoulder”[All Fields] AND “pain”[All Fields])

- Fields]) OR “shoulder pain”[All Fields])
- (“plasma”[MeSH Terms] OR “plasma”[All Fields]) AND (“shoulder pain”[MeSH Terms] OR (“shoulder”[All Fields] AND “pain”[All Fields]) OR “shoulder pain”[All Fields])
  - (“platelet-rich plasma”[MeSH Terms] OR (“platelet-rich”[All Fields] AND “plasma”[All Fields]) OR “platelet-rich plasma”[All Fields] OR (“platelet”[All Fields] AND “rich”[All Fields] AND “plasma”[All Fields]) OR “platelet rich plasma”[All Fields]) AND (“shoulder”[MeSH Terms] OR “shoulder”[All Fields])
  - (“blood platelets”[MeSH Terms] OR (“blood”[All Fields] AND “platelets”[All Fields]) OR “blood platelets”[All Fields] OR “platelet”[All Fields]) AND rich[All Fields] AND (“intercellular signaling peptides and proteins”[MeSH Terms] OR (“intercellular”[All Fields] AND “signaling”[All Fields] AND “peptides”[All Fields] AND “proteins”[All Fields]) OR “intercellular signaling peptides and proteins”[All Fields] OR (“growth”[All Fields] AND “factors”[All Fields]) OR “growth factors”[All Fields])) AND (“shoulder”[MeSH Terms] OR “shoulder”[All Fields])
  - (“intercellular signaling peptides and proteins”[MeSH Terms] OR (“intercellular”[All Fields] AND “signaling”[All Fields] AND “peptides”[All Fields] AND “proteins”[All Fields]) OR “intercellular signaling peptides and proteins”[All Fields] OR (“growth”[All Fields] AND “factors”[All Fields]) OR “growth factors”[All Fields]) AND (“shoulder”[MeSH Terms] OR “shoulder”[All Fields])
  - (autologous[All Fields] AND (“blood”[Subheading] OR “blood”[All Fields] OR “blood”[MeSH Terms])) AND (“shoulder”[MeSH Terms] OR “shoulder”[All Fields])
  - (“platelet-rich fibrin”[MeSH Terms] OR (“platelet-rich”[All Fields] AND “fibrin”[All Fields]) OR “platelet-rich fibrin”[All Fields] OR (“platelet”[All Fields] AND “rich”[All Fields] AND “fibrin”[All Fields]) OR “platelet rich fibrin”[All Fields]) AND (“shoulder”[MeSH Terms] OR “shoulder”[All Fields])
  - (“injections”[MeSH Terms] OR “injections”[All Fields] OR “injection”[All Fields]) AND (“platelet-rich plasma”[MeSH Terms] OR (“platelet-rich”[All Fields] AND “plasma”[All Fields]) OR “platelet-rich plasma”[All Fields] OR (“platelet”[All Fields] AND “rich”[All Fields] AND “plasma”[All Fields]) OR “platelet rich plasma”[All Fields]) AND (“shoulder”[MeSH Terms] OR “shoulder”[All Fields])
