# Supplementary material for: Can platelet-rich plasma injections provide better pain relief and functional outcomes in persons with common shoulder diseases: a meta-analysis of randomized controlled trials
Source: PubMed Central journal article supplement — Clin Shoulder Elb. 2021 Nov 19;25(1):73–89. doi: 10.5397/cise.2021.00353 (PMC8907495; doi:10.5397/cise.2021.00353), 2021-11-19
Supplement: cise-2021-00353-supple2.pdf [file cise-2021-00353-supple2.pdf]

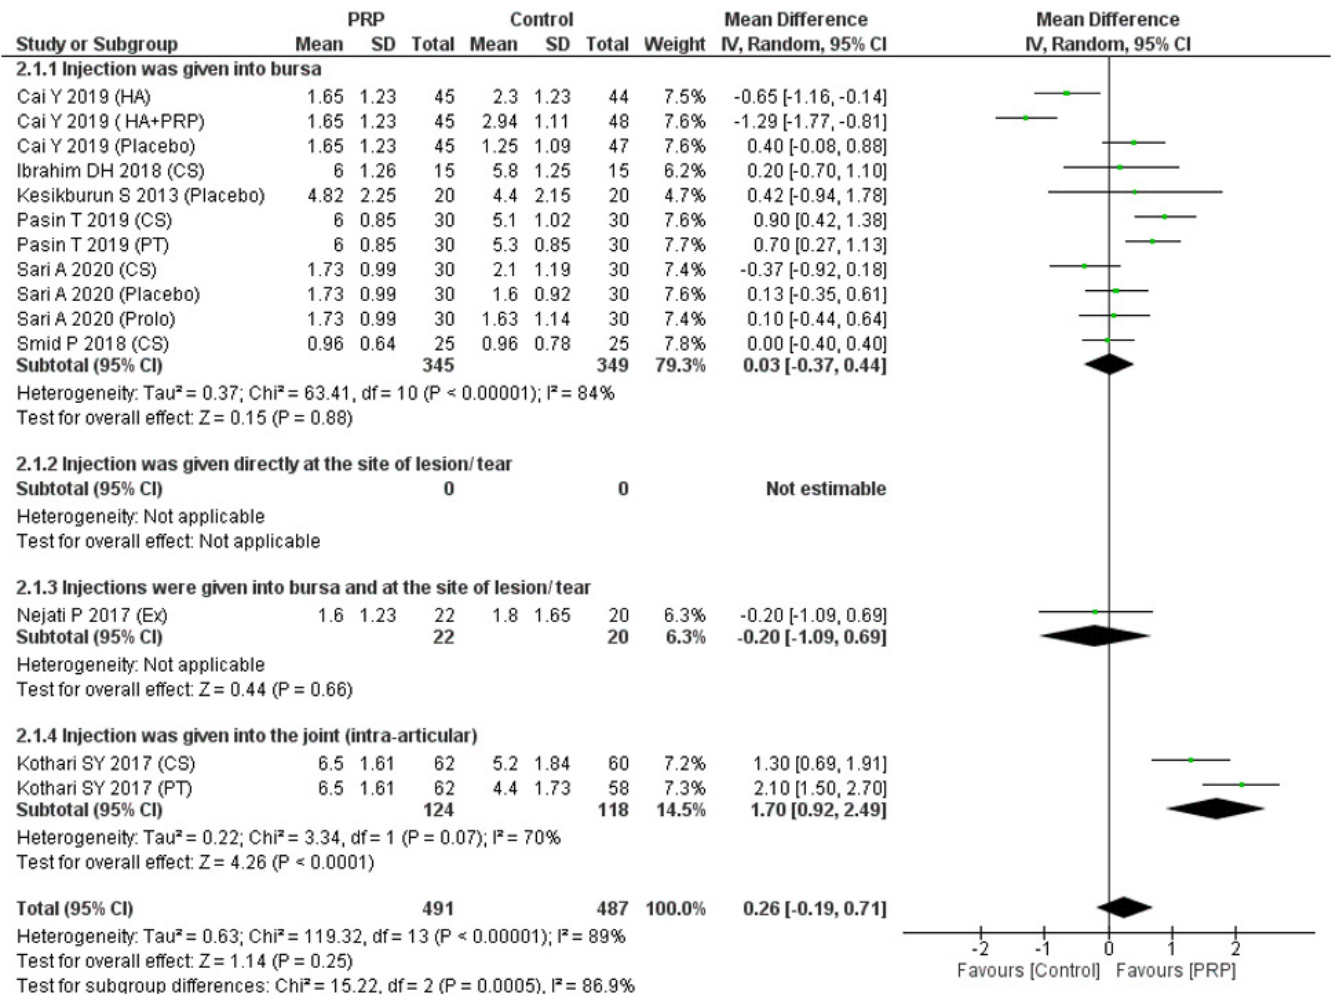

**Supplementary Fig. 1.** Forest plot of the included studies grouped according to the sites of injection and pooled using a random-effects model to assess short-term (8–12 weeks) pain relief: comparison between platelet-rich plasma (PRP) injections and control interventions. The vertical line indicates no difference between the intervention groups. SD: standard deviation, IV: inverse variance, CI: confidence interval; HA: comparator hyaluronic acid, HA+PRP: comparator combination of hyaluronic acid and platelet-rich plasma, CS: comparator corticosteroid, PT: comparator programmed physical therapy, Ex: comparator programmed exercise therapy.
