# Supplementary material for: Can platelet-rich plasma injections provide better pain relief and functional outcomes in persons with common shoulder diseases: a meta-analysis of randomized controlled trials
Source: PubMed Central journal article supplement — Clin Shoulder Elb. 2021 Nov 19;25(1):73–89. doi: 10.5397/cise.2021.00353 (PMC8907495; doi:10.5397/cise.2021.00353), 2021-11-19
Supplement: cise-2021-00353-supple5.pdf [file cise-2021-00353-supple5.pdf]

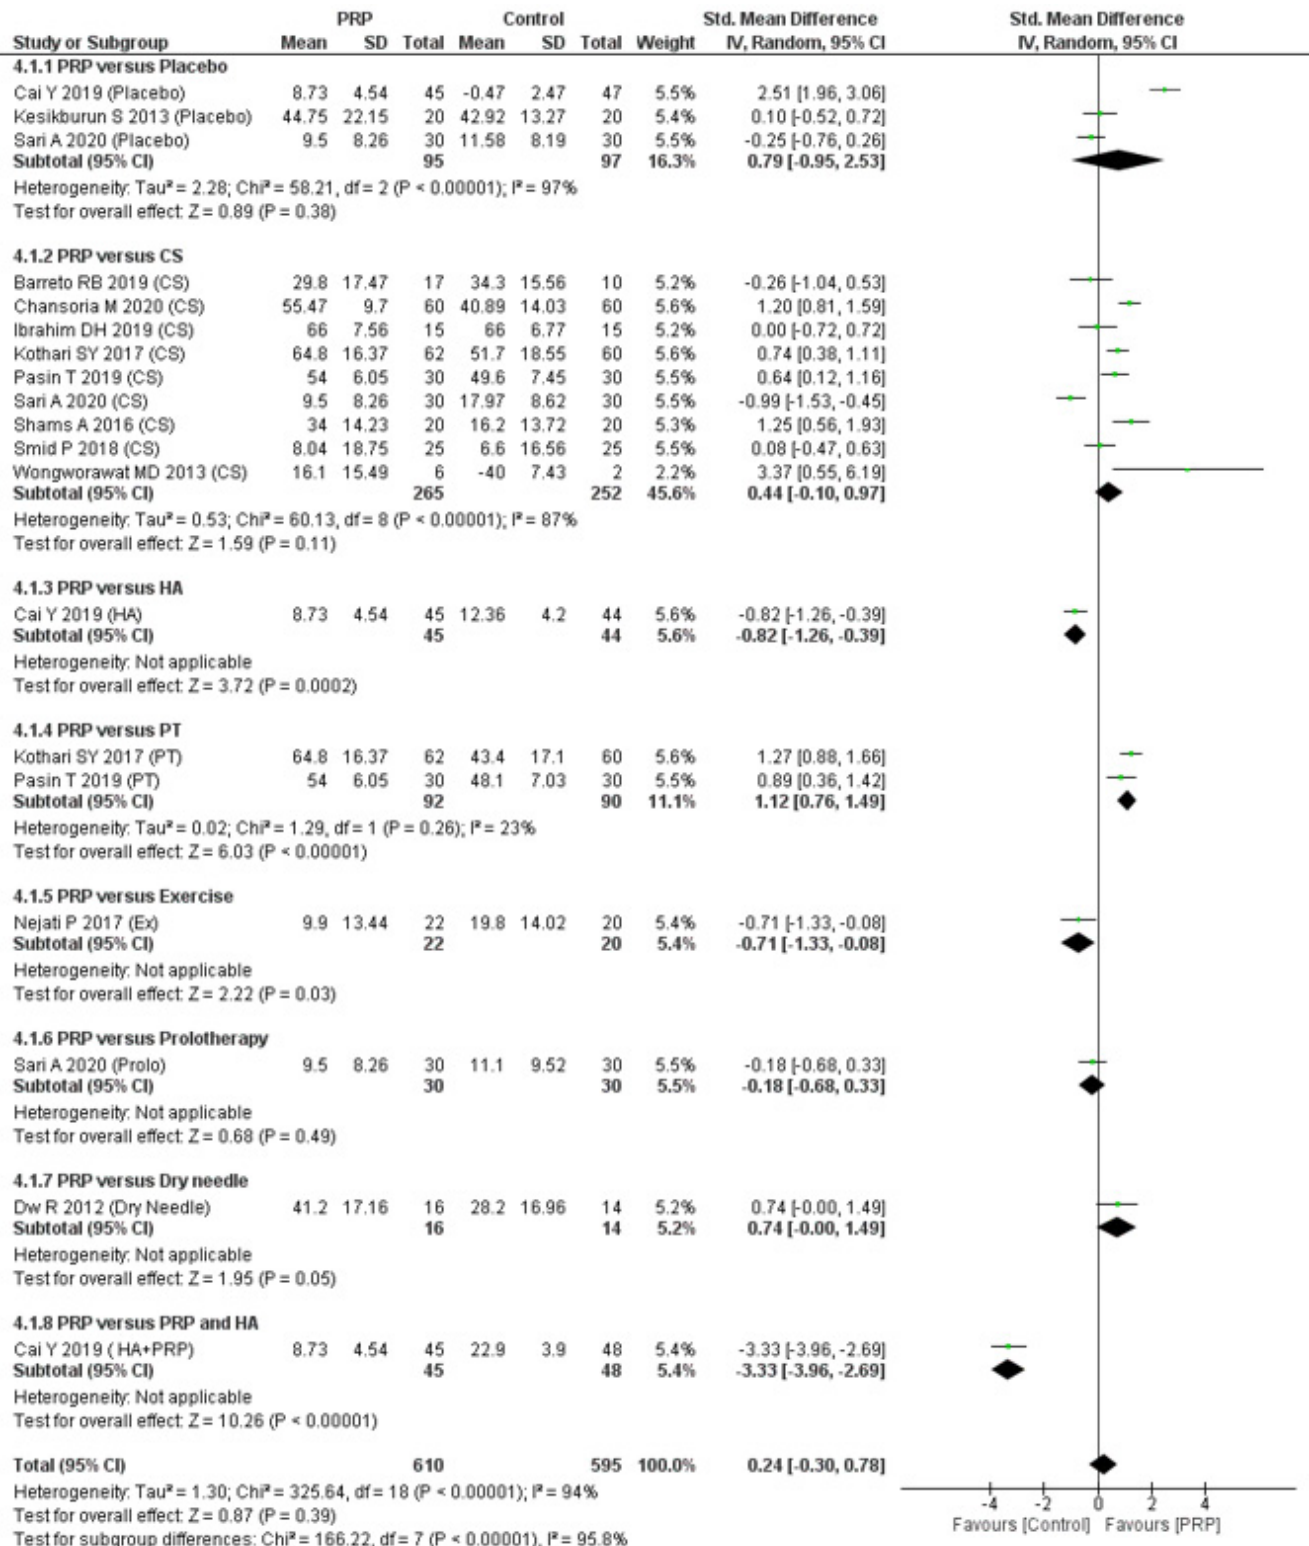

**Supplementary Fig. 4.** The forest plot for included studies pooled together using a random-effects model for assessing short-term (8–12weeks) functional outcome: comparison between platelet-rich plasma (PRP) injection and control interventions. The vertical line demonstrates no difference between the two intervention groups. SD: standard deviation, IV: inverse variance, CI: confidence interval; CS: comparator corticosteroid, HA: comparator hyaluronic acid, PT: comparator programmed physical therapy, Ex: comparator programmed exercise therapy
